# Supplementary material
Source: PubMed Central journal article supplement (PMC2409418)
Supplement: 0802328105_Supplemental_PDF.pdf [file 0802328105_Supplemental_PDF.pdf]

# Supporting Information

Duan *et al.* 10.1073/pnas.0802328105

## Other Supporting Information Files

[Dataset S1](#)

[Dataset S2](#)
